# Supplementary material for: Global distribution of methane emissions: a comparative inverse analysis of observations from the TROPOMI and GOSAT satellite instruments
Source: Copernicus journal article supplement (doi:10.5194/acp-2021-309), 2021-04-23
Supplement: Supplementary file [file acp-2021-309-AC2-supplement.pdf]

Reply on EC1

Thanks for the feedback on this work. We have responded to each reviewer comment below. Our replies are in blue, and the revised manuscript text is written in bold.

Hi,

Nice work, if I understood correctly a set of TCCON sites was used for this work. Is it possible to provide which ones ?

Regards

We changed the sentence describing TCCON sites used in this work to:

“Only 9 TCCON sites have continuous observations for the whole year of 2019, but 21 sites (**Bialystok, Bremen, Burgos, California Institute of Technology, Darwin, Edwards, Garmisch, Izana, Jet Propulsion Laboratory, Segal, Karlsruhe, Lauder, Lamont, Orleans, Park Falls, Paris, Rikubetsu, Sodankyla, Tsukuba, Wollongong, and Zugspitze**) have observations over the period of May 2018 – Apr 2019 when TROPOMI observations started to be available.”
